# Supplementary material
Source: MDPI journal article supplement (https://www.mdpi.com/2411-5150/7/3/53)
Supplement: s1 [file s1]

**Supplemental Table S1.** Sensitivity analysis using net present value for a teleretinal imaging site.

|                     | 20 Screenings per Month | 40 Screenings per Month | 60 Screenings per Month |
|---------------------|-------------------------|-------------------------|-------------------------|
| Year 1              | (\$5311)                | (\$2739)                | \$2405                  |
| Year 3              | \$4412                  | \$12,127                | \$27,558                |
| Year 5 <sup>†</sup> | \$14,135                | \$26,903                | \$52,520                |

<sup>†</sup> Estimated service life of a hand-held fundus camera.
